# Supplementary material for: The evolutionary dynamics of the Helena retrotransposon revealed by sequenced Drosophila genomes
Source: PubMed Central journal article supplement (PMC3087515; doi:10.1186/1471-2148-9-174), 2009-07-22
Supplement: 1471-2148-9-174-S1.pdf [file 1471-2148-9-174-S1.pdf]

**Additional File 1.** Sequences of the *Helena* reference copies.

>*Helena\_D.sechellia\_super\_107\_28043\_32931*  
TGAGCTGGTACACTGAGCGGTTGTTTATAGTTTTTGTCTGTGAATTTCACTTTAAATTTAATTCGCAAA  
CCTGCATTTCGTAGCTGTGCAAAACAGCAGCATTCTAAAATTTGGACTCTGCCTTGACAGAGTCGGCATGT  
GAACATCAACAAAAGATCGGTGGATAAAGGTGCGAAAAAGTTGCATTCTCTGCCCATTTGGGCCCTCACCAC  
GTGGCAGCCGCACAAGGGAGGCAACAAGCAACGTAATTTAGAAAAAATAAATAGACCCGGATTAGTAA  
CTGTAATGATGATACGAACAACGAACTTCTAACTCTCAGCTTAGAAAATAAGCCGATTGATTATGAAGAA  
ATGCGGCAAGTAGCTGGTAAGTCTCCACTGGATATCAGGATGGAGTTATTGAATCAACGCTCTTCATGCA  
CTGAATCTGTTAACCTAAGCACAATAACTACGACGATAACATTTACAAGTGCTACTTGGCAATACTACATC  
TACAACACTGCAGCAATCAGTAGGCCGAGCTCCAGAGAAAAAGCTGCTACTAGATTGTCTGATGCGCAA  
AAACTTCTGACGAAAAGAGAGGAAGAGGAAGACCAATTTAACACCCAACCATAGCTCTAAACGAGCTGTCA  
GAGACGCGAAGCTGGAGCCATATCCAGCCATAAATAGTAATTTCAAACCTCAAAACAATAGGTTTGGCCATGCT  
AGACATGGAATTTGGACGAAACCAGTGATGGCATAGAACTCCACAAGTTTGTCTGATGATGTCGATTACC  
TCGTGTGCATCGGCTGCTCCGAATATTCCTAATGATGACTGTGTACCAATGTGACATCCAATAGCCAC  
AACAGTATACTGATAAGCAGAATTTCTTATAAACAATCAAAACCACCGCAAAATAGTACTGAGCCTTACCAA  
TCTTAATGATCTCTATGAGCTCATTACGGAGGTCCTAGCCTAGATAATTTAACAGTTAAAGTCAATCAA  
GGGAAACAGTGAGAAATTTACCCAAAGACTCTGATACTTACAGAGCCATTATTAATATTTTGGATAAT  
CGGGAATTTGAATTCATACGTACCAAAATGAAGGAAGAGAAGCCTCACAGAATAGTTGTTAACCTAACCT  
ACGAAATTTATCGACAACCTTTAAAACATATGGCTTTGATGTTTACAAGTACACAACCCAAGATCCAGGAG  
AAATAGAGAAGAAAACTTAATATATTTCTTCAATTAATATAAAACCTTTTGTGCAAAAATTAATGACATATA  
CGATATTAACACAGTATGCCGACAGAAAAGTGGCGATAGAAAAGTGCCTGAAATCATCTGAAATTTGCTCAA  
TGCATACGTTTGTGAGCAATTTGGCCACACAGCTAAATACTGTCTGTCGTCATCCCACTGTGCTCGATGTG  
GTGAAATCACTTAACCAAGCTATGCGTACTTCCCAATGATCAACAGCCTATCTGTATACACTGTGGAGG  
AAATCACACGGCAAGTTACAAGGGTTGCCAGTTTTACCAGGAGTATCTTCGACGATCATTTGGGCACTGTA  
AAGAAGCAACAACCTAAGCAAGCCAGGTTTGTATAAAGTGCACAACAACCAACAACAACCCAGCAAAAAC  
AGCAGCATGCAATAGCTAGCACTCCCAAGATCATACTGGGAGCTTGTCTTACGACAGATATTGCAAAAA  
TGGCAATACAACAGCTCCAGCCTCGTCTACATAATGTACAATTAAGGGAACTAATATTAAGCAGCAACAC  
GGCATTGACGTTTCACTCAATATTTGGCACAGCAACAGGAACAATTTATGAAGTGGCAGCAACAGCTTCAAC  
AGCAACAACAGCAGCAATTTCTATCGTGGCTACTACAGCAGCAACAGGAGCAACAACAACAACAAGTT  
GAATAGTCAACGACTCGAAAGGCTGGAAAAAATTTGTTTTTGAATGGCCAATATGCTGAAGCAACGGACT  
GGGGATACATCGGCTCCCCAATCCATAGTAACGATTACCATCGCAATTAACCTCTGAAGATTTCTTAT  
CTGGAATGTAAATGGTTTTTTCAGGTAAAGCCAGAGAAAGTGCAGCTCTTCGCACACAACAACGGCATTGAC  
ATTTCTTCTCTAAACGAGATCAGACTCAACAGAGGGAAACACAGTTAAGATATATGGGTATAGCTTTTATC  
CCGATACAACACTTTCAGGCCATAATCACGGAATGGGAGGAGCAGCAGTACTGGTGAGAAGCTCTCTTTCG  
TCATTTCCCGCAAAGAGTTATTGAAACGAGAATTTTTCAGATGTCTTTCAGTCAAGGTCTCCACGGGCTG  
GGAGATATGGAATTTAGCGCGATTTACTGTCCACCAACAATAGAATTGAGGAAAGGCACTTTCAGTGACA  
TACTTGTCTCTTGTGGACAAAGGTATTTTCGTTGGTGGGGACTGAAACGCCCCGATATTGGCTATGGGGTGA  
TACGTACAATTAACCCAGAGGTCGAGAATAGCAGAAGCCATTTTCAGCCAGAGGTGCTTATATCCTTGCA  
ACAGGTTACCAACTAGATACCCACATGTGCCAGTACAGACTACCTGCATTGATTTTGTCTGTGTACC  
ATGGATACAACCTTAGACAGAATAGTATTTCTGAAATTTGGGATCTAGACTCCGATCATGTAGCCCTTGT  
GGCTACTGTACAACAGAAGGTGCCTATGTTAGACCATGCTCTCGGTTAATAAACAAGCCGAACTGATCTC  
CTTGTTTTTAGACAACATCTGGAAAATCTCTCCAATTAATAACGGTTCTGAGCTCTAAGGAAGATATCG  
AGAACGCAGTCTAAGAACGCAGTCTAACGCAAAATATATATATAGCCGCTTCTGCTTCTACGCCGAGAT  
ACGCCCCAGAAGTTATGGTATTGTTCTAACAAAGAGAGGCCAGATAAATTCAGAACTAAGAGACGCCCTT  
CGAAGAAGGCAATTCGAATCAGGATCCATGGGACAGAATCTTGTGGAACCGAGCAGCAAAAGCAACTCA  
AAGTCAATCTTAAGGGAACCTCAGAAGTGATTTCTTTGAGCAAAAATTTATCCTCCATGGACTACACCTTGA  
TGCAAACTATTTGCTGTGGAAGTGCACAAAAGCGCTTAAGCGACAACCACTTCGATGGGTACCCGTCGC  
TGTCCAGGTGGGGAATTTGCAAAAATTTGAAGTGGAAACAGGCTAATGCATTCGGCTTCCACCTAGAGTAT  
CGTTCACTCCTTACGACTTCGCCACGACAGAACAATAAGAGAGACTCACCAGTACCTACAAATGCCAT  
TGCAGATGTCTTGGCCTATTAAGCCAATAAGGATAGAAGAAATCCTTGAAATAATTAATTAATGCCGAA  
GCATAAAGCTCCAGGAATTTGACAGGATTTGTCTATGCCACGCTAAAGGTTTTACCTATAAAAAGCGATAATA  
TATATAGCACTAATCTTTAATGCTATTTTAAGGATCCAAGTGTTCCTAAGACAGTGGAAAAATGCCGTGCTA  
TTTTGATGATCCACAAGCCTGGAAAGCCGGAAGATGATCCAGAGTCGTATCGGCCTATAAGCCTCTTACC  
CTCACTTTCTAAATTTATGGGAGAGACTTATTGCAATCGGATAAACGACATTATAAGACAAGGCAATATC  
TTGCCGATCATCAATTTGGATTTTCGAAAGGGACACGGAATTTGAACAGGTCCACAGACTGGTGAAC  
ACATACTACAGGCTTTTTCAGGACTGCGAGTACTCCAACGCCGCTTTTATAGATATGCAACAAGCCTTCGA  
CAAAGTATGGCATGTTGGATTATTATGCAAGATAAAGACCCCTTCTACCTGCGCCCTACTTCTGTATTTTA  
AAGTCAATCTAGAAGAAGAGAAATTTAAAATCAAGGTGAGAAATAGCTACTCCTCTATATACCAATGA  
GAGCTGGAGTCCCTCAGGGCAGTGTCTCGGACCGCTACTGTATTCCTTGTACACTGCTGATATCCCTTG  
CCCGAGTTTTCGAACACATGGCAGCACCGAACAGGACTCTTATTGCAACCTATGCAGATGACATCGCAGTT  
GTATATAACTCTAGGGACAGCAGAGAGACAGCTAACGGACTACAAGAATATATTAATGATCTGGCAGCCT  
GGTGTAAACGGTGGAACTTAAAAATAAACCAGTAAAAACAACAACCCGTGCTTACGTTAAAAACGCT  
TATCCCGAACACCCCTCCAATTCGGCTAGAAGGATACCTGAATCAGACCTGCAAGCAACACATCTA  
GGTATCACCTGGATTAACGGCTCACCTTTGGGGCTACTTAAAAAAAACAGTAAAAAAAATGTGGCCACA  
GATTACAACAGCTGAGATGGCACATGAATAGAAGGAGCACTCTTTCGATGAGGTGCAAAAAGAGCTGTGTA  
TGCGCACTGTATCGTACCGATATGGTTATACGGGATCCAGATTTGAGGAATTGCAGCCAAATCGAATTA  
AATCGTATCCAGGTGATGCAAAATCGCGCATTACGACAAATAACCAACTGCCCTGGTATGTACCTAAT  
CTACACTCCATAAAGACCTCAATATTTACACAGTTGAGTCACAAATTTGGGAGACATACATGTGATATAG

TGACAGATTACTGAGCCATAGCAGTCTTCTTGCAAGACGTCTCATCCCCGCTCGACCTCTGAGAAGACTT  
AAACGGCAAGGCTTCGCCAAGCCAATTGGGCAGCAGTAAAACTCTTCATTTATGTTTCTACTCCACTTA  
TTTTATTTTATAGTGTGGTAATTGATAAGAATATTTCTCCACACTGTGATGTTAAGATAACGATATTAT  
GATGTACGGATTCTTCACTTAATAAATATAAAAAAAAAAAAAAAAAAAGTTTCGTTAAAAACA

>Helena\_D.yakuba\_contig197.8\_2845\_4599

CCATGGGACAGAATCTTGTGGAACCGAGCAGCAAAGCAACTGAAAGGCATTCTAAGGGAGCTCAGAAATG  
ATTTCTTTGAGCAAAAATTATCTTCCATGGACTACACAGTTGATGCAAACTATTTCGCTGTGGAAGTGCAC  
AAAAGCGCTCAAGAGACAACCATTTTCGATGGGTACCAGTACGATGTCTTGGCGGGCAAATTCGAAAAAGT  
GAAGTGGAACAGGCTAATGCATTCGGCTACCACCTTGAGGATCATTTCACTCCTTATGACTTCGCCACGA  
CAGAGCAGATAAGTGAGACTCACCAGTACCTACAAATGCCATTGCAGATGTCTTTGCTATTAAGCCAAT  
AAGAATAGAAGAAATATCTGAAGTAATTAATCACTGCCGAAACATAAAGCTCCAGGATATGACAGGATC  
TGCCACGCCACGCTAAAGGTTTTACCTATAAAAAGCGATCATCTATATAGCACTTATCTTTAACGCTATTT  
TAAGGGTCCAAGTATTTCCAAGACAGTGGAAAATGGCTGTTATCATGATGATCCACAAAACCCGGGAAACC  
AGAAGCTGATCCTGAGTCTTATCGGCCTATAAGCCTGTTACCCTCCCTCTCTAAATTTATGGGAAAGACTT  
CTTGTCAAAGGATCAATGACATTTGTAAGACAAGGTTATATCTTGGCCGACCATCAATTTGGATTTCCGA  
AGGGACACGGCACTGTAGAACAGGTCCACAGACTGGTGAAGCACATATTACAGGCTTTTGACGACTGCGA  
ATACGCAAACGCTGTCTTTATAGATATGCAACAAGCCTTCGACAAAGTATGGCATGTTGGATTATTATGC  
AAGATAAAGACCATGCTTCCCTGCGCCCTACTTCTGTATTTTAAAGTCATATCTAGAGGGACGAGAATTTA  
AAATCAGACTTAGGAATAACTACTCTACCGTATATCCAATGAGAGCTGGAGTCCACAGGGCAGCGTCCCT  
TGGACCCTACTATACTCTTGTACACTGCAGATATCCCTTGCCCGAACTTCGATCACATGGAAGCACCC  
TACAAGGCTCTTATGGCAACCTATGCAGATGACATCGCAGTGGTGTATAAAGTCTGGGGACAGCCGAGAG  
CAGCGAAAGGACTGCAAGAATACATTAATGCTCTAGCAGCCTGGTGTAAACGGTGGAAATCTAAAAATAAA  
TGCAACGAAAACCAAAATCTATGTTTACATTTGAAAACGCTCATCAAAAAAACACCCCACTCCAGCTA  
GAAGGATTTACACTAGACCAGCCGCTGCAAGCAACATATCTAGGTATAAAGTGGATAAAGCCTCACCT  
TTGGGCCGCTCTCAAAAATGCAGTAAAGAAATGTGGTTCGAGATCACAACAAGTGGATGGCTCATGAA  
CAGAAGGAACCCCTCTCGCTGAGATGCAAAAAGAGCTGTGTATGCGCACTGTATCCTACCGATCTGGTTA  
TACGGGATCCAGATTTGGGGAATCGCAGCCAAATCAAATTAACAACGAATCCAGGTGATGCAAAAATCGAG  
CACTGCGACAAATAACCAACTGCCCTGGTACGTACGGAAGTCTACACTCCATAAGGACCTCAATCTCTA  
CACAGTTGAGGAACAAATTTGGGAGACACACAAGTGCATACAGTGACAGACTACAGAGTCAATAGTACCTT  
CTTGAAGACGTCTTATCCCCGCTCGACCTCTGAGACGACTCAAAAAGGCAAGGCTTTGCCAAGACATTTG  
GACAG

>Helena\_D.erecta\_scaffold\_4845\_2218646\_2221251

AATGCGTACATCATCGAAATTGCTGAATGCATACGTTGTGAGGAATTCGCCACACATCTAAATACTGT  
CGAAGTCATCCAAATTTGTGCTCGCTGTGGTGAATACTCACTTAACCCAGTTATGCGTGCCTTCCAATGGTC  
AACAGCCTATCTGTATACACTATGGAGGAAATCACACGGCAAGTTACAACGGTTTCCAGTGGTAACAGGA  
GTATCTTCGACGATCAATGGGCACTACAAAAAGCAACCCTAAGCAAGCCAGGTTAGATTTAAAGTGCA  
ACAAACAGCAATAAAGTGCAGCAAAAACAGCATATGTAACCTAAGCAGCATCAATAGCAAGCACTCCCA  
AAGCCATACCGGGAGTTTTTCTACGCAGCTATTGCAAGAAATGGCAATACAACAGACAAGCCTCGTCT  
ACATAACGTACATGCCCAATTAAGGAATATAATATTAACAGCAACGCCCCGATTAACGTTTCAAGTCAATA  
TTGGCACAGCAGCAGGAACAATTTATGAATTTGGCAGCAACAGCAGCAATTCCTATCGTACTACAGGAGC  
AACAACAACAAAACAAGCTGAATAGCCAACGACTCGAACGGTTGGAAAAACTGGTTTTTGAATGGCCAA  
TATGCTGAAGCAATGGACTGGGGATGCATCGGCTCTCCAATCCATTGTAACGCTTTACCATCGCAATGA  
ACCCTGTGAAGATACTTATCTGGAATGTAATAGTATTTCAAGTAAAGCCAGAGAAGTTGAGCTCTTTCAC  
ACACAACAAGTGCCTTGCATTTACTTCTTAAACAGACTCAGACTCAACAGAGGGAACACCGTTAAGATA  
CATGGATATAGCTTTTATAATATAAAGTATATTTATATATATATATATATTTATATATATATATATAT  
TCCCCGCATACAAACCATCAAGCCATAATCATGGAATGGGGGAGCAGCAGTACTGGTGGAGGACTCTCT  
TCGTCATTTCCCGCAAAGAGTTATTGAAACGAGAAGTATTCAGATGTCTTCAGTTAAGGTTTCCACCGGG  
CTGGGAGATATGGAATTTAGCGCGATATACTGTCCACCAAAATAGAATTTGAAGAAAAGGCACTTCAGTG  
ACATACTTGTCTCTTTGTGGCCAAAGGTATTTAGTTGGTAAGGACTGGAACATTAGCTATGATGTGACGGG  
TGATACGTACAATACCCACGGGTCCAGAAGTACGAGAAGCCATTTTCAGCCAGAGGTTGCTTATATCCTT  
GCAACAAGTTCACCAACTTGATACCCACATGTGCCAGTCATAGACCTACCTGCATTTGATTTTGTGTGT  
ACCATGGGATAAACGTAGACAGAACAAGTATTTGCGAAATTTGGGATCTAAACTCCGATCATGTAGCCCG  
TGTTGCTACTCTACAACAGAAGGTGTCTATGTTACGCCATGTTCTCGGTTAAAAAAAACCGATTTTTTT  
TGTTTTAGACATCTTGAACACTTTTTCAATTAATAACGGTTCTCAGCTCTAAGGAAGAGATCAAGAAC  
CCAGTAGACATCCGAACGCAAAATATACATAGACCCGCTTCTGTTTCCACGCGCTGAGCCTGAGACAT  
GCCCCACATGTTATGGCATTGTACTAACAAGAGAGGCCTAACAAGAGAGAACTAATCAGAACTAAAAGAC  
GTCTTCGAAGAAGAGCAATTCGAACTCGGGATCCATGGGACAGAATCTTGTGGAACCGAGCAGCAAAGCA  
ACTCAAACCATCTTAAGGGAAGTCAAGGATTTTCTTTGAGGAAAAAGTATCTTCCATGGACTACAC  
TGTTGATGCAAACTATTTCGCTGTGGAAGTGCACAAAAGCGCTTAAACATCAACCCTTAGATGGGTACCC  
GTCGGTACCACCTAGAGGATCCCTTCACTCCTTATGACTACGCCACGACAGACAAGAGAGAATCACCAG  
TACCTACAATGCCATTTGCTTTGGCTTTGGCTTATTAAGCAATAACGATAGAAGAAATATCTGAAATAA  
TCAAATTAATGCCGAAACCAAAGCTCCTGGGTGCTATCGGCCTATAAGCCTCTTACCCTCCCTTTCTAA  
ATTATGGGAGAGACTTTTTGCCAATTTGGATCAACGACATTATAAGACAAGGTAATATATTTGCCGGATCCT  
CAATGTGGATTTGAAAGAGACACGGCACAATAGAACAGGTCCACAGACTGGTAAAACATATATTTACAGG  
CTTTTGACGACTGCGAGTCTGCTTTTATAGACATGCAACAAGCCTTCGACAATGTATGGCATGTTTGATTA  
TTATGCTAGATGAAGACCTCTCACTGCGCCCTACTTCTGTATTTTGAAGTCATATCTGAAATTTAAAAAT  
CACGGTGAAGAAATAACTACTCTTCTATATATCCAATGAGAAGTGGAGTCCACAGGGCATGTTTCTCGAA  
CCGTTACTGTATTCTTGTACACTGTGATATCGCTTGCTGAATTTGCAACACATGGTAGCACCACAACA

AGGCTCTTATGGCAACCTATGCAGATGACATTGCAGTTGTGTACAACCTCTAGGGACAGTAGAGAGACAGC  
TACAAGGATACATTAA

>Helena\_D.ananassae\_scaffold\_12984\_435983\_440038

TATGAACTCTAAAAGGTGCATAGAGAAGTGAAGTTTGATTACCCCTCAGTATCAATCAGCCAGGAAAAGC  
TCCAGCAATAGATTTGCTTTACTAGACATGGAAGTGGACCTAAACAGTATCACACATGCTGAGGAAAAGAA  
CAATCAATGTAGAGGGAAGCCCTACTAGATCTCCTATGGCTGTTCAAGAAAATATATCTGACGATAATGT  
AGACACAGATGATTTAGGCAATAGATCCCAACAGAATGATTCTAATAGAAAATTTATTATCTTAAAGAAAAT  
GCAAAACCACCGCAAATAGTTTTAAGCATTGCTAACCTAAATGATCTATTTGACCTCATTTCCGAGGTCA  
CTAGCTTGGATAACGTAACAGTTAAAAGTCAATCAAGGAGTTACGGCTAGAATATTTCCCAAGGACTCTAC  
AACTTATAGAGCTATTGTGCGACATTTTTGATAGAATGGAAATTGAATTCCATACATACCAAAATGAAGGAA  
GAGAAGCCTCACAGAATCGTAGTTAAAGGACTTCATCATAGCACACTAACTACTGAAAATTTGTTGCCAATT  
TTAAAACATTTGGCTTCGATGCTCTTCAGGTGCATAACCCAAGATCAAGGTCGAACCATGATGTAAAATTT  
AAACATATTTTTTATTAATATTAAGCCTTGGCGCTAGAATTAATGCTATATATGATATAGTAACATTTGTGT  
CGACACCCAAATTTGTGCTCGATGTGGCGAAGACCATTTTACATGTGTTTACCATGTGTTCCGACCCCAAGA  
TCAACCGCCAATCTGCATGCACTGTGGAGGCAATCATTTCGGCAAGCTACAAGGTTTGTGAGTCTTATCAA  
AATTACCTCAGGCGATCTATGGGTTCTGCAAGAAGCAAAACAACGCGACAACAACCAACAACCGTCAATC  
AGCAACAACAGTCAACTCGACAATAAATACTCCACATATTTCTGCAACCAATAGTGGAGGTTTATCTTA  
TGCTTCAATAGTAAGAAAATGAAAATGAACCAGCTCAACGCCGTCTACATGATCTCCAAGTCACAAGTACA  
CAAATCGAAGGAAAATGTGCAACAACAATATGCGACTGATGTTTCAAGCAATTTTAGAGCAACAGCAACAG  
CTATTTATGAAATGGCAACAACAACCTCAAGAAAAGCAGCAGCAGCAATTCCTTATGTGGCTAAGGCAGC  
AGCATCAAGAACAACAATGCAAAAACAAGCTGAACAGTCAACGACTTGAACGCTTTTAAAATATGGTTTT  
TGAAATGGCAAACTCGATCAAGCAATGGACTGGAGATAAATCACTTCTTTCAGCTTCCCAACAACGCTTCA  
GCCTCACAAATGAACCCACTCAAAAATTTCTTATTTGGAACGTCATGGCATTTTAGGTAAAGCCAGAGAAA  
TGAATTTCTTCGCGCACACCAACGAAGTTGATATCCTACTCCTAAGTGAATTAAGGCTCAATCGAGGAGAA  
ATTGTCAAATTTTATGGATATTTCTTTTATCCAGCATACAAAACCGGCAAGACACAATCACGGCACCCGGAG  
GAGCGGGGATTTGGTAAAGGAGCTCTCTTAGTCATTTTCCACAAAAGTGTATTGAAACACAACCAATTTCA  
AATGTCTCTATCAAAGTTGACACAGGTTTGGGTATCATGGTAGTATGCGCAATATACTGTCTCTCAAGA  
AACAGAATTGAAGAAAGGCATTTCACTGACATACTCGCTTCTTGTGGTTCAGAGGTATCTGGTTCGGTGGTG  
ACTGGAATGCTAGACATTTGGATGTGGGGCGACACTTACAATTCACCAAGAGGACGCGAGCTAGCTGAATC  
CACTGTAGTAACAGGGGCTAAAATTTTCCACTGGTTCACCAACTAGATACCCTTATGTACCTGGCCAC  
ACAGCTTCTTGATAGACTTTTGCAATATACCATGGGATACTGGATTCTCAAATAAGTATAGGCCAAAAT  
GGGATTTGGACTCGGATCACATAGCTCTCGTTGTTAATCTGCAACAACAATGGTGTACAGATCAGACCAAG  
CCCTCGTTTTAATTACAAGCCGAACCTGATCTCAATACTTTCAAACAACATCTTGAGACCTCTTTCAACTA  
AATTTCTGTTCTGAACTCTAGAGAAGACATCGAGAATGCAGTTGACATTTCTTACTGATAATATATATAGAG  
CTGCTACTGTTTTCAACGCCACCAGAACCTGTTCTTCGTCTATAAGCTATGGCATTTGTTTACAAGGGA  
GGCGAGAGAGTTAATCAAGAGAAAAAGGCGCTTCGAAGAAGAGCAATTCGTTCTCAAGATCCTTTGGAC  
CGAAATAGATGGCACCAGGCTGAGAGGCAACTACGAATGTTTTAGATGAACTCCGAAGCGATTTGTTTTCG  
AGCAAAAAGTTATCTCTATGGACAATACCGTTGACGCAAACTACTCACTATGGAAGTGCACAAAATCGCT  
TAAACGACAACCTTTTAGACAAGTTCCAGTCCGATGTCCTGATGGTGAACCTGGCAAAAATGAAATGGAG  
CAGGCTAATGCTTTTGGCCAGCATCTAGAGGATCGCTTTACTCCCTTTAACTTTGCATCGGTAGAACAGA  
CTAGAGAGACCTATCAGAGTTTGGAGACTCCATTGCAGATGTCCTGCTATTAAGCCTATAAGAGTCGA  
GGAAATATCTGATGTCATAAATCTTTGCCAAAAACAAGCTCCGGGTATTGATCGAGTTTGTACAGCT  
ACGTTAAAGGCCCTTGCTGCAAAAAGCAATCCTTTTATAGCATTAATTTTTTTCATGCAATAATTAGGATCC  
AAGTGTATCCCAAAACAGTGGAAATTTGGCTGCGATTATGATGATCCATAAGCCAGGGAACAGAGGTTGA  
TCCTGAGTCATATCGTCCAATTAGTCTCCTACCTGTTTTGTCTAAACTGTGGGAGAGACTTATTGCAAAAC  
CGAGTTAAAAGGATTATGACTGAAAACAATATCTTGCCAGATCATCAATTTGGCTTTTCGAGGAGGACACG  
GCACCGTGGAAACAGGTTTACAGACTGGTGAACATATCTTGCAGGCCTTTGACGATCAGGAGTATTCCAA  
CGCAGTTTTTATCGATATGCAGCAAGCTTTTGGATAAGGTGTGGCATGATGGCTTATTGCTCAAAAATTA  
AATCTTTTACCTGCGCCGTAATGTTGTTAGATCATATTTAGAAGTACGAGAATTTCAAGGTGAAAAG  
TAAAAGATTCATACTCGGACAATTTTTGATGAGAGCAGGAGTTCCACAGGGAAGTGTGCTTTGGACCGTT  
GTTGTACTCACTGTATACGGCAGATATACCTATCCCAGCAGCCAACATATGGTAGCCCTTAAAGCA  
CTTATTGCGACCTATGCAGATGACATTGCAGTCATTTACAACACAGATGTCACAGAGAAGCTTTCCAAAG  
GATTACAGGAGTACCTATTTACTCTTGCAGCTTGGTGCAAAAGATGGAACCTGAAGATCAATCCGTAGAA  
AACAACGAACGTCGCTTTACACTGAAGAGGCTCATAATTAATACCCCTCAAATCCAACCTTGAGGGAGTT  
ACCCTAGAACAGCAAAACGAAGCAAAATATCTTGGTATTACTCTGGACAAGCGACTTACTTTTCGGGCCAC  
ATCTGAAGTCAACAACCTAAAATATGTAATATGAGGGTTTCAGCAGCTGCGTTGGATGATAAGCAAAAGAA  
TACCATGCCGCTTAGGTGCAAAAGGGCAGTATATGTTTCAATGTCATCCTGCCAATGTGGCTTTATGGTGT  
CAAATTTGGGGGATCGCCGCCAAATCGAACTATAAGCGAATCCAGGTGTTGCAGAACCGAATGCTGAGAA  
CCATAACAGGCTGTCCCTGGTACGTGCGTGGCTCCACTTTCATAGAGACCTTAACATACATACTGTGGA  
AGAACAGATAAATAGACACACAAGCCGTTACAGCGACAGACTTCTAAGACATCGCAGCCTACTGGCTAGA  
AATTTACTTCCAGCTAGACCATTGAGGCGTCTTAAACGTCAGGTTTTGCTAAGACACTTAATTTAG

>Helena\_D.mojavensis\_scaffold\_6540\_6787901\_6792402

ATGGACAAAACCTTTCTGCTAACTCTCAGCTTAGAAAATAAGCCGATTGATTATGCAAGAATGTGCCAAA  
TAGCTGGGAAAACACCTTTTGGAGCTGAGGGCTGAATTTCAATAACCAACGCCCTATCATGCACTGATTCTCA  
GAATCTCAGCACCATGACAACAACAATCACATTTACTAGTGCTACTTGTAGCACAGTATATACCACCGCA  
ACTGTTGCAATTAACAGCGCGATCCCTAGCGGAAGAATGGATAGTCAGGCAGCCGGCTTTCCACCTGACT  
CTGTAAAACCTTACTGGAGCTGTACAACAAGTGGCAGCAGCCAGAAAATGCTTAAAACCTAAAAGGAAGAT  
ACCTCTATCTCCAATAACAATAACAAGAGCAAAACAGAGTTGAGGTTCTCACACTCCGCTTCAACTAAT

ATGGCAAAATCCAGTAACAGCTTTGCTTTACTGGACATGGATATGGACGCAACCAGTGAAGGCGAGGATG  
ATGTGAATCCCAGCTTTCTATTGTTGATCATAGCAACACTGCTGATGCAATTGATACAGTCAACAGCCA  
TCAGAATAAAGAACCCAGCAACAACCAACAGACTCTCGGGTCATCTAAGCCACCGCAAATCGTTGTGAGT  
ATCACTGATCTTAATGATCTATTTGAAATCATTAGTGAAGTCACCAGTATTGATAACGTATCAGTCAAGA  
TCAACCAAGGAGTGACGGCTAGAATATTTCCCAAAGATAGCGACACTTACAGAGCTATCGTAAGCCATTT  
TGATGCGATAGGTATTGAGTTCCATACGTATCAGATGAAGGAAGAAAAACCTTACAGAATTGTAGTAAGA  
GGGCTACACCATAGTACCTTGAACAATGAAATAATTGCCAATTTTAAAAAATATGGCTTCGATGCTCTGC  
AAATTCACAACCCAAGGTACCGGTCAAACAGGGATGCAAAATTAATATATTTTTTTGTAAACATAAAACC  
TTGTAAAAACATTAACGAAGTTTACAATATAAAAAACTTTGCCGCCAAATGGTGAGAGTTGAAAGGATG  
CGTAAAACTTCTGAAATCGTCATATGTACCCGATGCCAAGAATATGGCCATACAGCCAAATACTGCCGTC  
GCCATCCTAACTGTGCACGCTGTGGCGAGGACCATCCCACCAATCTTTGCGCACGTTTACAAGATGCACC  
GCCTACCTGCCTTCACTGTGGAGGTAACCACATGGCAAGCTACAAAGGCTGCCCGTGGTACCAGGAGTTC  
TATCGACGTTCACTGGGCTCCTCTACGATCAAGAAGAATCAAGCAAGACCACAACAGCCACAACCGAAGC  
ACCAGCATCAACCAACACGTCACACAACCAACACAGCAGCTATCAAATACTTCTGGAGTTGGAGCAGG  
TGGAATATCCTATGCCGCGGTAGCAAGAAATGGAAGCGCATCTGCTCAAAGCCGCATACATAATATTCAA  
GCGCAAGCCAGTTAGCTAAACCTATAGGACATATCGCACAGCAGCAGCATCAAGTTGATGTCCAATCTT  
TACTGGAACAACAACAACAACAATTTTTGAAATGGCAAAAAGACTTGCAAGTGCAGCAACAGCAGCAATT  
TCTTTCATGGCTTCAAGCACAACAACGCGAACAGCAACAACAACAAGAGAAACAGTGAACGACTAGAA  
CGTCTAGAAAAAATGGTCCACGAAATGGCCAGCATGCTCAAGCAATGGACTGGGGATTTCATCGACTCACC  
AGCTTCTTAACAACGCCTCAGCCTCACAATGAACCCACTCAAGATTCTCATCTGGAATGTCAATGGCATT  
GCAGGAAAAGCCAGAGATGTGGAGCTATTGCGGCACAACAACAACATCGACATTTACTATTAATGAAA  
TCAGACTGAATCGAGGAGATACAGTCAAAAATATATGGTACACCTTCTATCCAGCTTACAAGCCATCAAG  
CCACAACCATGGTATGGGAGGAGCGGCTATATTGTTAGAAGTTCACTGCGCCACTTCCCACAAAAGGGTT  
ATTGAAACTCAAAATATACAAATGTCTGCAATCAAAGTTGCCACTGGATTGGGAGACATCGAATTTTGGC  
CCATATACTGCCACCAAGGAACAGAATAGAAGAAAGACAATTCAGCGACATACTCGCTTCTTGGCGCCA  
AAGGTATCTTATTGGTGGTACTGGAATGCACGACACTGGCTGTGGGGAGATTTCATACAATTCACCCAGG  
GGAAGAGAATAGCAGAAGCCATCACGGCCAGAGGACTAATATTTTGAACAGGTTCTCTACTAGTT  
ACCCATATATATCCAGTCATACTCCCTCTTGCATTGATTTTGCATTATACCATGGGATACAGCATTATCA  
AGCAAATATTTACCAAAGCTGGGACTTAGACTCTGACCATTTAGCCCTTATTGCGGAGTTACACATCGAT  
GGTCATTATATCAGGCCAAGCCCAAGGCTAATAACCAGCCGTAATGACATCGAGGCTTTCAGACAACAGC  
TAGATGACTCCATTCAATTTGAATTTGTGTCTGAACTCCGGCGAAGACATCGAGAATGCGGTTGATAATCT  
CTCGGAGAACATATATAGAGCTGTGTGCTGCTACAACGCCGCTTAATCTGCGCCTCGTCCCAATAATAT  
GGCATTGTTCTAAGGAGAGAAGCCAAAGAATCATCAGAACAAGGCGCCTTCGTAGAAGAGCAATTC  
GATCCCAAGATCCTTGGGACCGCCTTTTGTGGAACCGGGTAGCAAGACAGCTACGTAACCTTTTAAAGGGA  
ACTCAGAAGCGATTTCTTCGAGCAAAAAGCTGGCTTCCATGGACTACACTATTGATGCAAACTATTCGTTA  
TGGAAATGCACAAAATCACTCAAACGACAACCTTTTAGACAGGTACCTGTCCGATGCCCTAACGGCGAAG  
TTGCTAAATGCGAATTGGAACAGGCTAACGCATTTCGGATGTCTAGAAAGACGTTTTACTCCATTTAG  
TTATGCTACGACGGAGCAGACCATGGAGATACAGTATATTTGCAGACCCCTTGCAGATGTCTCTGCCT  
ATTGAGCCTATAAGGATTGAAGAAATACCGAAGCGATCCAAATATTGCCGAAAAATAAAGCTCCCAGAA  
TAGACAAGATTTGCAACGCAACGCTGAAGGCCTTACCTACAAGAGCGCTACTTTACATTGCACTAATCTT  
CAATGCCATCATCAGGCTCCAAGTGTTCCTCAAGGCAATGGAATTAGCTGCTATCTTGATGATCCACAAG  
CCTGGCAAGCCGGAAGAGGATCCAGAGTCATATCGGCCCTATAAGTCTACTGCCCTCCTTGTCTAAACTAT  
GGGAGAGGACCATTTGCCAACCGCATTAAACGCAATATTTAGACAATCCAATATCTTACCGGATCACCATT  
TGGATTCCGGAGGGACACAGCAGTGAACAGGTCATAGACTGGTGAAAACACATCTTGCAGGCTTTT  
GATGACTCTGAATCTCCAATGCTGTCTTTATCGACATCGAGCAAGCGTTTGATAAGGTGTGGCAGCATG  
GATTAAGTGTACAAAATAAAAAACCTTCTACCTGCTCCGTAATGAGCTACTATGGCCTCTTAAAGATCTT  
CCGTGTGTTCCAAGTCAAGGTAAAAGATACACTCTCGTCCACATAACCTATGAGAGCAGGAGTGCCGAG  
GGCAGTGTCTTGGTCCGCTGCTGTTCTCCTTGTACACCTCTGATATACCTAGCCCGTCTCTCAACATA  
TGGATGCTCCCTCGAAAGCTGTCAATTGCCACATATGCTGATGATATTGCCATCATCTATAACTCAAAAA  
CGTGGTTGAAGCAAGTACAGGACTACAGAGATATCTGGATACTCTCGCTGATTGGTGCAAGCGGTGGAAT  
CTCAAAGTTAACCCGTAATAAACATTTGAACCTTGTCTCACTCAAAAAGGCTGGCAATGCATACCCCC  
CAATCCAGATGTCGGGAGTAACCTACAGCAACCTGCTCAGGTGAAATATCTTGGCATCACACTGGACAA  
GCGCCTCACCTTCGGTCCACACCTCAAAGCTACGGTGAAAAAATGTCTGTCACAGACTGCAACAATTAAGA  
TGGCTCACCATAGAAAGAGCACCTTACCGCTGAGATGCAAAAGAGCTGTCTATGTGCACTGCATCCTAC  
CAATATGGCTCTATGGAGTGCAATCTGGGGGATCGCTGCAAAATCGAATTATAAAAAGAGTGCAGGTTTT  
GCAGAACAGAGTGTAAAGGCAGATAACAAACTGTCCCTGGTACATACGCGGCTCAACACTGCATAGAGAC  
CTCAAGCTGTCTACTGTGCAAGAACAATAAATAAACACACAAGCAGATACTCAGACAGACTTGTACGAC  
ATCAAAGCCTACTCGCAAGAGGTCTAACACCTGCCAGACCCCTAAGACGACTTAAACCGGAGGCTTTGCG  
CAAAACAATGGGTATTCAATAA

>Helena\_D.virilis\_scaffold\_13050\_111322\_111882

TTCCAAAGCAATTGGAAACTAGCAGCGATTATGATGATTTCTCAAGCCAGGCAAACCAGAAGCTGATCCTG  
AGTCGTATCGCCAAATAAGTCTCTTACCCTCCCTGTCTAAACTATGGGAGAGGACTATTGCCAATCGGAT  
TACTGCCATTACAAGCCAATGCAATATCTTGGCCGATCACCGATTTCGGATTTTCGAGAGGGACACGTCCT  
GTGGAACAGGTGCACAGACTGCTGAACCATATCATGCAGGCTTTTACTACTAGAGTTCTCAAACGCTG  
TCTTCATTGACATGCAGCAAGCCTTCGATAAGGTGTGGCAGGATGGATTACTGTGCAAAAATAAAAAACCT  
TTAACCTGCACCGTACTATGGCCCTCTAAGGTCAATTTTGGAAAGTACGAGAGTTCAAGGTCAAGGTAAGG  
GACACATACTCGTCCACCTATACTATGAGAGCAGGAGTGCCACAGGGTAGTGTCTTGGATCCGCTGCTGT  
ACTCGTTGTATACCTCAGATATACCAGCCCTACCTCTCAACATATGGACGATCCCTCTAAGGCTATTATT  
G
